# Supplementary material
Source: Springer Nature journal article supplement (https://www.springermedizin.de/resource/supplementary/12936_2009_930_MOESM5_ESM.pdf/9548560)

1

2

M

3

4

?1.2kb →

729 bp →

438 bp →

291 bp →

205 bp →

A

B

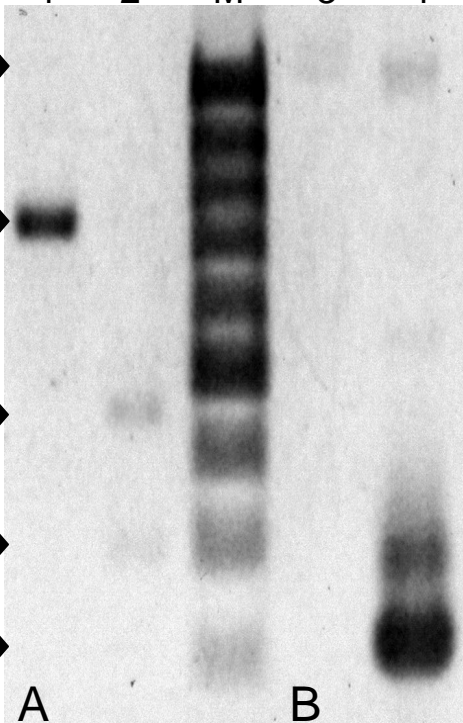

Supplement: MOESM5 [file 9548560]
